# Supplementary material for: Cardiovascular safety profile of CTLA-4: a pharmacovigilance analysis of the US Food and Drug Administration Adverse Event Reporting System (FAERS)
Source: Research Square preprint supplement (doi:10.21203/rs.3.rs-6307761/v1), 2025-05-07
Supplement: Supplementary file 1 [file 620223c730d3ad05981017e9.docx]

Supplementary Material

**Cardiovascular safety profile of CTLA-4: a pharmacovigilance analysis of the US Food and Drug Administration Adverse Event Reporting System (FAERS)**

**Xiang Li1†，Wei Ling1†，Xiao Li1，Rui Wei2，Shudong Chen1，Jiali Tang1，Juxiang Zang1，Fang Xiang*,1**

*** Correspondence:** Fang Xiang: [845392178@qq.com](mailto:845392178@qq.com)

# Supplementary Table

**Table S1 The events we are concerned about in SMQ and the PT table used.**

|  | **SMQ “Cardiac Failure”** | |
| --- | --- | --- |
| **PT** | Acute left ventricular failure | Cor pulmonale acute |
| Acute pulmonary oedema | Cor pulmonale chronic |
| Acute right ventricular failure | Ejection fraction decreased |
| Cardiac asthma | Hepatic congestion |
| Cardiac failure | Hepatojugular reflux |
| Cardiac failure acute | Left ventricular failure |
| Cardiac failure chronic | Low cardiac output syndrome |
| Cardiac failure congestive | Neonatal cardiac failure |
| Cardiac failure high output | Obstructive shock |
| Cardiogenic shock | Pulmonary oedema |
| Cardiopulmonary failure | Pulmonary oedema neonatal |
| Cardiorenal syndrome | Radiation associated cardiac failure |
| Chronic left ventricular failure | Right ventricular ejection fraction decreased |
| Chronic right ventricular failure | Right ventricular failure |
| Cor pulmonale | Ventricular failure |
|  | **SMQ “Cardiomyopathy”** | |
| **PT** | Atrial septal defect acquired | Hypertensive cardiomyopathy |
| Biopsy heart abnormal | Hypertrophic cardiomyopathy |
| Cardiac amyloidosis | Ischaemic cardiomyopathy |
| Cardiac hypertrophy | Kearns-Sayre syndrome |
| Cardiac sarcoidosis | Metabolic cardiomyopathy |
| Cardiac septal hypertrophy | Muscular dystrophy |
| Cardiac siderosis | Myocardial calcification |
| Cardiomyopathy | Myocardial fibrosis |
| Cardiomyopathy acute | Myocardial haemorrhage |
| Cardiomyopathy alcoholic | Non-obstructive cardiomyopathy |
| Cardiomyopathy neonatal | Peripartum cardiomyopathy |
| Cardiotoxicity | Pulmonary arterial wedge pressure increased |
| Congestive cardiomyopathy | Restrictive cardiomyopathy |
| Cytotoxic cardiomyopathy | Right ventricular ejection fraction decreased |
| Diabetic cardiomyopathy | Stress cardiomyopathy |
| Ejection fraction abnormal | Tachycardia induced cardiomyopathy |
| Ejection fraction decreased | Thyrotoxic cardiomyopathy |
| Eosinophilic myocarditis | Ventricular septal defect acquired |
| HIV cardiomyopathy | Viral cardiomyopathy |
|  | **SMQ “Hypertension”** | |
| **PT** | Accelerated hypertension | Hypertensive heart disease |
| Blood pressure ambulatory increased | Hypertensive nephropathy |
| Blood pressure diastolic increased | Labile hypertension |
| Blood pressure inadequately controlled | Malignant hypertension |
| Blood pressure increased | Malignant hypertensive heart disease |
| Blood pressure management | Malignant renal hypertension |
| Blood pressure orthostatic increased | Maternal hypertension affecting foetus |
| Blood pressure systolic increased | Mean arterial pressure increased |
| Diastolic hypertension | Metabolic syndrome |
| Eclampsia | Neurogenic hypertension |
| Endocrine hypertension | Orthostatic hypertension |
| Essential hypertension | Page kidney |
| Gestational hypertension | Pre-eclampsia |
| HELLP syndrome | Prehypertension |
| Hyperaldosteronism | Primary hyperaldosteronism |
| Hypertension | Procedural hypertension |
| Hypertension neonatal | Renal hypertension |
| Hypertensive angiopathy | Renal sympathetic nerve ablation |
| Hypertensive cardiomegaly | Renovascular hypertension |
| Hypertensive cardiomyopathy | Retinopathy hypertensive |
| Hypertensive cerebrovascular disease | Secondary aldosteronism |
| Hypertensive crisis | Secondary hypertension |
| Hypertensive emergency | Supine hypertension |
| Hypertensive encephalopathy | Systolic hypertension |
| Hypertensive end-organ damage | Withdrawal hypertension |
|  | **SMQ “Pulmonary hypertension”** | |
| **PT** | Acute right ventricular failure | Pulmonary valve incompetence |
| Cardiac ventriculogram right abnormal | Pulmonary vascular resistance abnormality |
| Central venous pressure increased | Pulmonary vein occlusion |
| Chronic right ventricular failure | Pulmonary vein stenosis |
| Cor pulmonale | Pulmonary veno-occlusive disease |
| Cor pulmonale acute | Right atrial dilatation |
| Cor pulmonale chronic | Right atrial enlargement |
| Portopulmonary hypertension | Right atrial hypertrophy |
| Pulmonary arterial hypertension | Right atrial pressure increased |
| Pulmonary arterial pressure abnormal | Right ventricular dilatation |
| Pulmonary arterial pressure increased | Right ventricular dysfunction |
| Pulmonary arterial wedge pressure increased | Right ventricular enlargement |
| Pulmonary artery dilatation | Right ventricular failure |
| Pulmonary artery thrombosis | Right ventricular heave |
| Pulmonary artery wall hypertrophy | Right ventricular hypertension |
| Pulmonary capillary haemangiomatosis | Right ventricular hypertrophy |
| Pulmonary endarterectomy | Right ventricular systolic pressure increased |
| Pulmonary hypertension | Tricuspid valve incompetence |
| Pulmonary hypertensive crisis | Vascular resistance pulmonary increased |
| Pulmonary tumour thrombotic microangiopathy |  |
|  | **SMQ “Ischaemic heart disease”** | |
| **PT** | Acute coronary syndrome | Coronary revascularisation |
| Acute myocardial infarction | Coronary vascular graft occlusion |
| Angina pectoris | Coronary vascular graft stenosis |
| Angina unstable | Dissecting coronary artery aneurysm |
| Angina unstable | ECG signs of myocardial ischaemia |
| Anginal equivalent | External counterpulsation |
| Arteriosclerosis coronary artery | Haemorrhage coronary artery |
| Arteriospasm coronary | Ischaemic cardiomyopathy |
| Blood creatine phosphokinase MB abnormal | Ischaemic mitral regurgitation |
| Blood creatine phosphokinase MB increased | Kounis syndrome |
| Coronary angioplasty | Microvascular coronary artery disease |
| Coronary arterial stent insertion | Myocardial hypoxia |
| Coronary artery bypass | Myocardial infarction |
| Coronary artery compression | Myocardial ischaemia |
| Coronary artery disease | Myocardial necrosis |
| Coronary artery dissection | Myocardial reperfusion injury |
| Coronary artery embolism | Myocardial stunning |
| Coronary artery insufficiency | Papillary muscle infarction |
| Coronary artery occlusion | Percutaneous coronary intervention |
| Coronary artery reocclusion | Periprocedural myocardial infarction |
| Coronary artery restenosis | Post procedural myocardial infarction |
| Coronary artery stenosis | Postinfarction angina |
| Coronary artery surgery | Prinzmetal angina |
| Coronary artery thrombosis | Silent myocardial infarction |
| Coronary brachytherapy | Stress cardiomyopathy |
| Coronary bypass stenosis | Subclavian coronary steal syndrome |
| Coronary bypass thrombosis | Subendocardial ischaemia |
| Coronary endarterectomy | Troponin I increased |
| Coronary no-reflow phenomenon | Troponin increased |
| Coronary ostial stenosis | Troponin T increased |
|  | **SMQ “Torsade de pointes/QT prolongation”** | |
| **PT** | Electrocardiogram QT interval abnormal | Long QT syndrome |
| Electrocardiogram QT prolonged | Torsade de pointes |
| Long QT syndrome congenital | Ventricular tachycardia |
|  | **SMQ “Cardiac arrhythmia”** | |
| **PT** | Accelerated idioventricular rhythm | Pulseless electrical activity |
| Arrhythmia | Reperfusion arrhythmia |
| Cardiac fibrillation | Rhythm idioventricular |
| Chronotropic incompetence | Sudden cardiac death |
| Electrocardiogram repolarisation abnormality | Torsade de pointes |
| Electrocardiogram RR interval prolonged | Ventricular arrhythmia |
| Electrocardiogram U wave inversion | Ventricular extrasystoles |
| Electrocardiogram U wave present | Ventricular fibrillation |
| Electrocardiogram U-wave abnormality | Ventricular flutter |
| Heart alternation | Ventricular parasystole |
| Heart rate irregular | Ventricular pre-excitation |
| Pacemaker generated arrhythmia | Ventricular tachyarrhythmia |
| Pacemaker syndrome | Ventricular tachycardia |
| Parasystole | Withdrawal arrhythmia |
| Paroxysmal arrhythmia |  |
|  | **SMQ “Embolic and thrombotic events”** | |
| **PT** | Acute aortic syndrome | Mesenteric vascular occlusion |
| Acute myocardial infarction | Mesenteric vein thrombosis |
| Administration site thrombosis | Mesenteric venous occlusion |
| Adrenal thrombosis | Mesenteric venous occlusion |
| Amaurosis | Microembolism |
| Amaurosis fugax | Monoparesis |
| Angiogram abnormal | Monoplegia |
| Angiogram cerebral abnormal | Myocardial infarction |
| Angiogram peripheral abnormal | Myocardial necrosis |
| Angioplasty | Obstetrical pulmonary embolism |
| Angioplasty | Obstructive shock |
| Aortic bypass | Ophthalmic vein thrombosis |
| Aortic embolus | Optic nerve infarction |
| Aortic surgery | Ovarian vein thrombosis |
| Aortic thrombosis | Paget-Schroetter syndrome |
| Aortogram abnormal | Pancreatic infarction |
| Application site thrombosis | Prosthetic vessel implantation |
| Arterectomy | PT Peripheral artery thrombosis |
| Arterectomy with graft replacement | PT Pulmonary artery thrombosis |
| Arterial bypass occlusion | Pulmonary artery occlusion |
| Arterial bypass operation | Pulmonary artery therapeutic procedure |
| Arterial bypass thrombosis | Pulmonary embolism |
| Arterial graft | Pulmonary endarterectomy |
| Arterial occlusive disease | Pulmonary infarction |
| Arterial stent insertion | Pulmonary microemboli |
| Arterial therapeutic procedure | Pulmonary oil microembolism |
| Arterial thrombosis | Pulmonary thrombosis |
| Arteriogram abnormal | Pulmonary tumour thrombotic microangiopathy |
| Arteriogram carotid abnormal | Pulmonary vein occlusion |
| Arteriotomy | Pulmonary veno-occlusive disease |
| Arteriovenous fistula occlusion | Phlebectomy |
| Arteriovenous fistula thrombosis | Pituitary infarction |
| Arteriovenous graft thrombosis | Placental infarction |
| Artificial blood vessel occlusion | Pneumatic compression therapy |
| Atherectomy | Popliteal artery entrapment syndrome |
| Atherosclerotic plaque rupture | Portal shunt |
| Atrial appendage closure | Portal shunt procedure |
| Atrial thrombosis | Portal vein cavernous transformation |
| Axillary vein thrombosis | Portal vein occlusion |
| Basal ganglia infarction | Portal vein thrombosis |
| Basal ganglia stroke | Portosplenomesenteric venous thrombosis |
| Basilar artery occlusion | Post procedural myocardial infarction |
| Basilar artery thrombosis | Post procedural pulmonary embolism |
| Blindness transient | Post procedural stroke |
| Bone infarction | Post thrombotic syndrome |
| Brachiocephalic artery occlusion | Postinfarction angina |
| Brachiocephalic vein occlusion | Postoperative thrombosis |
| Brachiocephalic vein thrombosis | Postpartum thrombosis |
| Brain stem embolism | Postpartum venous thrombosis |
| Brain stem infarction | Precerebral artery occlusion |
| Brain stem stroke | Precerebral artery thrombosis |
| Brain stem thrombosis | Profundaplasty |
| Budd-Chiari syndrome | Papillary muscle infarction |
| Capsular warning syndrome | Paradoxical embolism |
| Cardiac ventricular thrombosis | Paraneoplastic thrombosis |
| Carotid angioplasty | Paraparesis |
| Carotid arterial embolus | Paraplegia |
| Carotid artery bypass | Paresis |
| Carotid artery occlusion | Pelvic venous thrombosis |
| Carotid artery stent insertion | Penile artery occlusion |
| Carotid artery thrombosis | Penile vein thrombosis |
| Carotid endarterectomy | Percutaneous coronary intervention |
| Catheter site thrombosis | Peripheral arterial occlusive disease |
| Catheterisation venous | Peripheral arterial reocclusion |
| Cavernous sinus thrombosis | Peripheral artery angioplasty |
| Central venous catheterisation | Peripheral artery bypass |
| Cerebellar artery occlusion | Peripheral artery occlusion |
| Cerebellar artery thrombosis | Peripheral artery stent insertion |
| Cerebellar embolism | Peripheral embolism |
| Cerebellar embolism | Peripheral endarterectomy |
| Cerebellar infarction | Peripheral revascularisation |
| Cerebral artery embolism | Pulmonary venous thrombosis |
| Cerebral artery occlusion | Quadriparesis |
| Cerebral artery thrombosis | Quadriplegia |
| Cerebral congestion | Renal artery angioplasty |
| Cerebral hypoperfusion | Renal artery angioplasty |
| Cerebral infarction | Renal artery occlusion |
| Cerebral infarction foetal | Renal artery thrombosis |
| Cerebral ischaemia | Renal embolism |
| Cerebral microembolism | Renal infarct |
| Cerebral septic infarct | Renal vascular thrombosis |
| Cerebral thrombosis | Renal vein embolism |
| Cerebral vascular occlusion | Renal vein occlusion |
| Cerebral vascular occlusion | Renal vein thrombosis |
| Cerebral venous thrombosis | Retinal artery embolism |
| Cerebrospinal thrombotic tamponade | Retinal artery occlusion |
| Cerebrovascular accident | Retinal artery thrombosis |
| Cerebrovascular accident prophylaxis | Retinal infarction |
| Cerebrovascular disorder | Retinal vascular thrombosis |
| Cerebrovascular insufficiency | Retinal vein occlusion |
| Cerebrovascular operation | Retinal vein thrombosis |
| Cerebrovascular stenosis | Shunt occlusion |
| Choroidal infarction | Shunt thrombosis |
| Coeliac artery occlusion | SI QIII TIII pattern |
| Collateral circulation | Silent myocardial infarction |
| Compression garment application | Silent myocardial infarction |
| Coronary angioplasty | Spinal artery embolism |
| Coronary angioplasty | Spinal artery thrombosis |
| Coronary arterial stent insertion | Spinal cord infarction |
| Coronary artery bypass | Splenic artery thrombosis |
| Coronary artery embolism | Splenic embolism |
| Coronary artery occlusion | Splenic infarction |
| Coronary artery reocclusion | Splenic thrombosis |
| Coronary artery surgery | Splenic vein occlusion |
| Coronary artery thrombosis | Splenic vein thrombosis |
| Coronary artery thrombosis | Stoma site thrombosis |
| Coronary bypass thrombosis | Stress cardiomyopathy |
| Coronary endarterectomy | Stroke in evolution |
| Coronary revascularisation | Stroke in evolution |
| Coronary vascular graft occlusion | Subclavian artery embolism |
| Deep vein thrombosis | Subclavian artery occlusion |
| Deep vein thrombosis postoperative | Subclavian artery thrombosis |
| Device embolisation | Subclavian vein occlusion |
| Device occlusion | Subclavian vein thrombosis |
| Device related thrombosis | Superior mesenteric artery syndrome |
| Diplegia | Superior sagittal sinus thrombosis |
| Directional Doppler flow tests abnormal | Superior vena cava occlusion |
| Disseminated intravascular coagulation | Superior vena cava syndrome |
| Disseminated intravascular coagulation in newborn | Surgical vascular shunt |
| Embolia cutis medicamentosa | Testicular infarction |
| Embolic cerebral infarction | Thalamic infarction |
| Embolic pneumonia | Thrombectomy |
| Embolic stroke | Thromboangiitis obliterans |
| Embolism | Thromboembolectomy |
| Embolism | Thrombolysis |
| Embolism arterial | Thrombophlebitis |
| Embolism venous | Thrombophlebitis migrans |
| Endarterectomy | Thrombophlebitis neonatal |
| Femoral artery embolism | Thrombophlebitis superficial |
| Foetal cerebrovascular disorder | Thrombosed varicose vein |
| Graft thrombosis | Thrombosis |
| Haemorrhagic adrenal infarction | Thrombosis corpora cavernosa |
| Haemorrhagic cerebral infarction | Thrombosis in device |
| Haemorrhagic infarction | Thrombosis mesenteric vessel |
| Haemorrhagic stroke | Thrombosis prophylaxis |
| Haemorrhagic transformation stroke | Thrombotic cerebral infarction |
| Haemorrhoids thrombosed | Thrombotic microangiopathy |
| Hemiparesis | Thrombotic stroke |
| Hemiplegia | Thrombotic thrombocytopenic purpura |
| Heparin-induced thrombocytopenia | Thyroid infarction |
| Hepatic artery embolism | Transient ischaemic attack |
| Hepatic artery occlusion | Transverse sinus thrombosis |
| Hepatic artery thrombosis | Truncus coeliacus thrombosis |
| Hepatic infarction | Tumour embolism |
| Hepatic vascular thrombosis | Tumour thrombosis |
| Hepatic vein embolism | Ultrasonic angiogram abnormal |
| Hepatic vein occlusion | Ultrasound Doppler abnormal |
| Hepatic vein thrombosis | Umbilical cord occlusion |
| Homans' sign positive | Umbilical cord thrombosis |
| Hypothenar hammer syndrome | Vaccination site thrombosis |
| Iliac artery embolism | Vascular access site thrombosis |
| Iliac artery occlusion | Vascular graft |
| Iliac vein occlusion | Vascular graft |
| Implant site thrombosis | Vascular graft occlusion |
| Incision site vessel occlusion | Vascular graft thrombosis |
| Infarction | Vascular operation |
| Inferior vena cava syndrome | Vascular pseudoaneurysm thrombosis |
| Inferior vena caval occlusion | Vascular stent insertion |
| Infusion site thrombosis | Vascular stent occlusion |
| Injection site thrombosis | Vascular stent thrombosis |
| Inner ear infarction | Vasodilation procedure |
| Instillation site thrombosis | Vena cava embolism |
| Intestinal infarction | Vena cava filter insertion |
| Intra-aortic balloon placement | Vena cava filter removal |
| Intracardiac mass | Vena cava thrombosis |
| Intracardiac thrombus | Venogram abnormal |
| Intracranial venous sinus thrombosis | Venoocclusive disease |
| Intraoperative cerebral artery occlusion | Venoocclusive liver disease |
| Ischaemic cerebral infarction | Venous angioplasty |
| Ischaemic stroke | Venous occlusion |
| Jugular vein occlusion | Venous operation |
| Jugular vein thrombosis | Venous recanalisation |
| Lacunar infarction | Venous repair |
| Leriche syndrome | Venous stent insertion |
| Mahler sign | Venous thrombosis |
| May-Thurner syndrome | Venous thrombosis in pregnancy |
| Medical device site thrombosis | Venous thrombosis limb |
| Mesenteric arterial occlusion | Venous thrombosis neonatal |
| Mesenteric arterial occlusion | Vertebral artery occlusion |
| Mesenteric arteriosclerosis | Vertebral artery thrombosis |
| Mesenteric artery embolism | Vessel puncture site occlusion |
| Mesenteric artery stenosis | Vessel puncture site thrombosis |
| Mesenteric artery stent insertion | Visceral venous thrombosis |
| Mesenteric artery thrombosis | Visual acuity reduced transiently |
| Mesenteric vascular insufficiency | Visual midline shift syndrome |
